# Supplementary material for: Spectroscopic Studies of Quinobenzothiazine Derivative in Terms of the In Vitro Interaction with Selected Human Plasma Proteins: Part 2
Source: MDPI journal article supplement (doi:10.3390/molecules28020698), 2023-01-10
Supplement: s1 [file s1]

## Supplementary materials

# Spectroscopic Studies of Quinobenzothiazine Derivative in Terms of the In Vitro Interaction with Selected Human Plasma Proteins. Part 2

Aleksandra Owczarzy <sup>1</sup>, Wojciech Rogóż <sup>1</sup>, Karolina Kulig <sup>1</sup>, Jadwiga Pożycka <sup>1</sup>, Andrzej Zięba <sup>2</sup> and Małgorzata Maciążek-Jurczyk <sup>1,\*</sup>

<sup>1</sup> Department of Physical Pharmacy, Faculty of Pharmaceutical Sciences in Sosnowiec, Medical University of Silesia, 40-055 Katowice, Poland

<sup>2</sup> Department of Organic Chemistry, Faculty of Pharmaceutical Sciences in Sosnowiec, Medical University of Silesia, 40-055 Katowice, Poland

\* Correspondence: mmaciazek@sum.edu.pl; Tel.: +48-32-364-1582

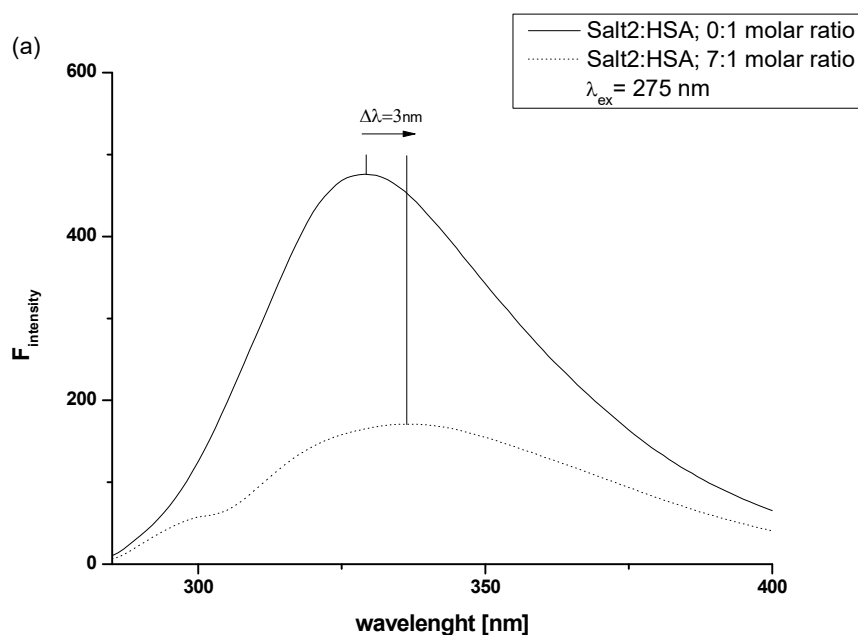

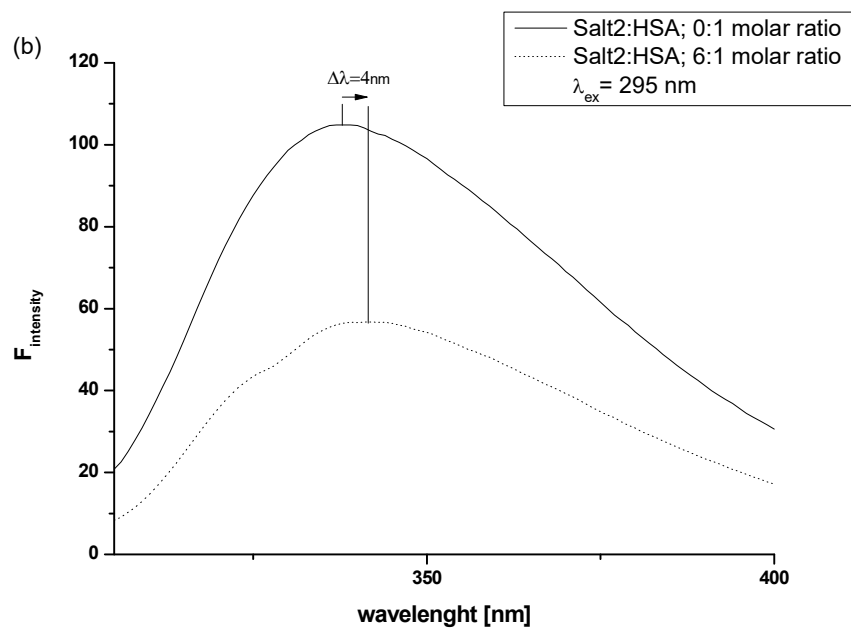

**Figure S1.** Emission fluorescence spectra of human serum albumin (HSA) in the presence of Salt2 at Salt2:HSA 0:1 and 7:1 and Salt2:HSA 0:1 and 6:1 molar ratios at a)  $\lambda_{ex}$  275 nm and b)  $\lambda_{ex}$  295 nm, respectively.

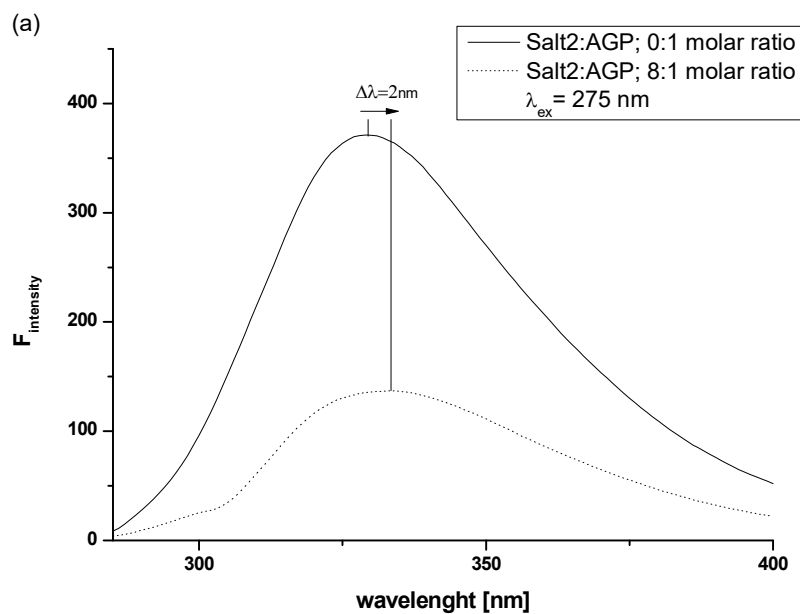

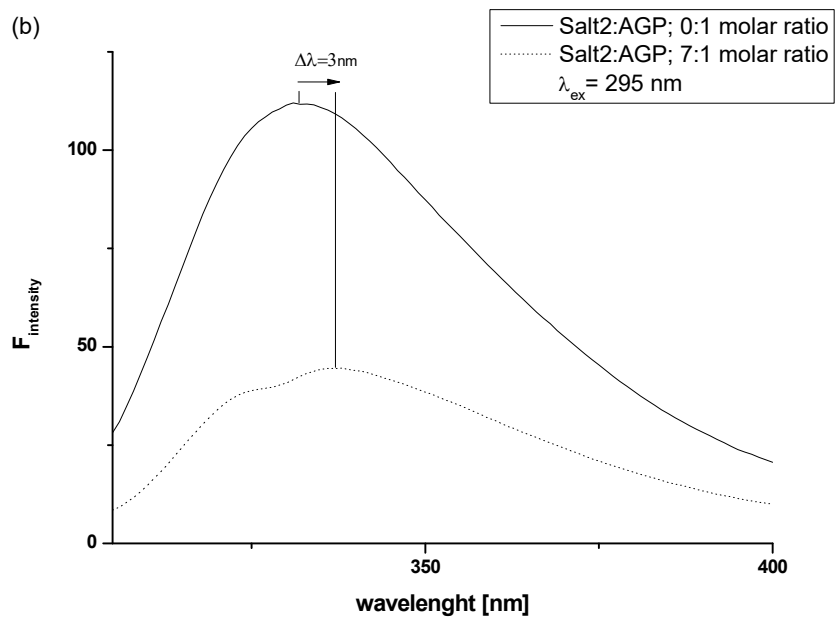

**Figure S2.** Emission fluorescence spectra of  $\alpha_1$ -acid glycoprotein (AGP) in the presence of Salt2 at Salt2:HSA 0:1 and 8:1 and Salt2:HSA 0:1 and 7:1 molar ratios at a)  $\lambda_{\text{ex}}$  275 nm and b)  $\lambda_{\text{ex}}$  295 nm, respectively.

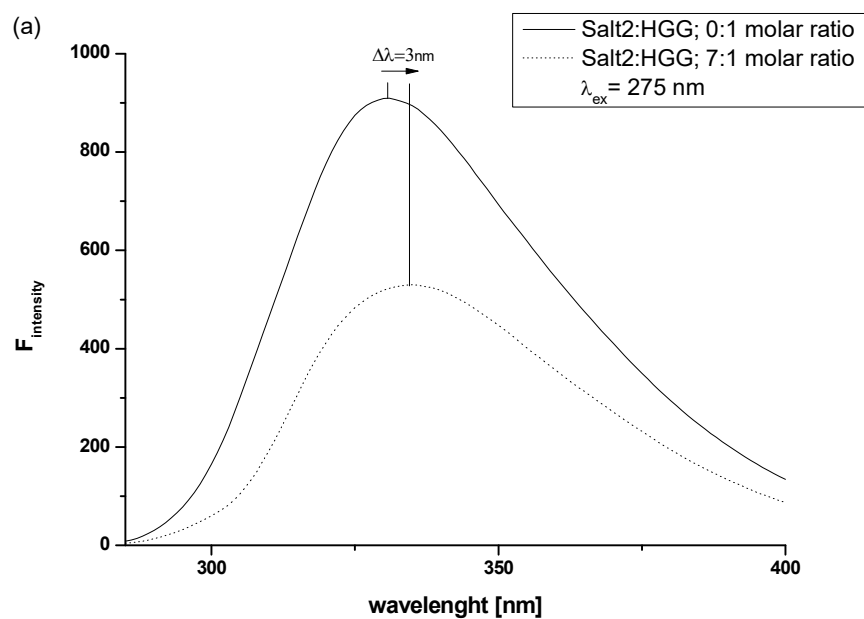

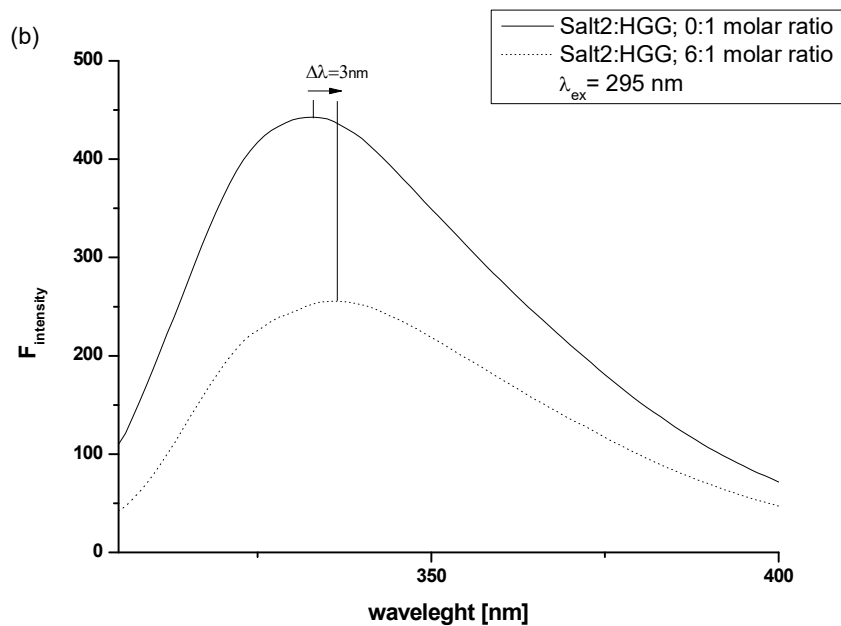

**Figure S3.** Emission fluorescence spectra of human gamma globulin (HGG) in the presence of Salt2 at Salt2:HSA 0:1 and 7:1 and Salt2:HSA 0:1 and 6:1 molar ratios at a)  $\lambda_{\text{ex}}$  275 nm and b)  $\lambda_{\text{ex}}$  295 nm, respectively.

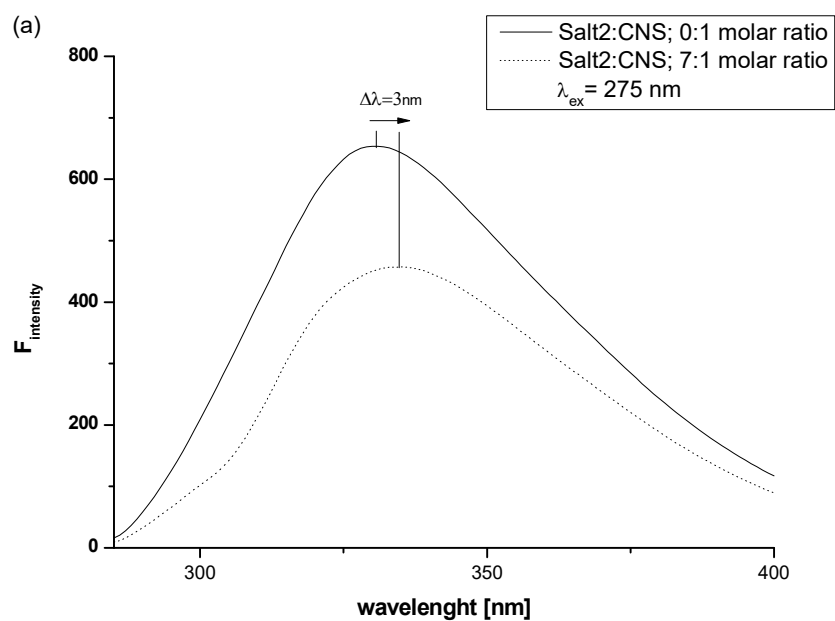

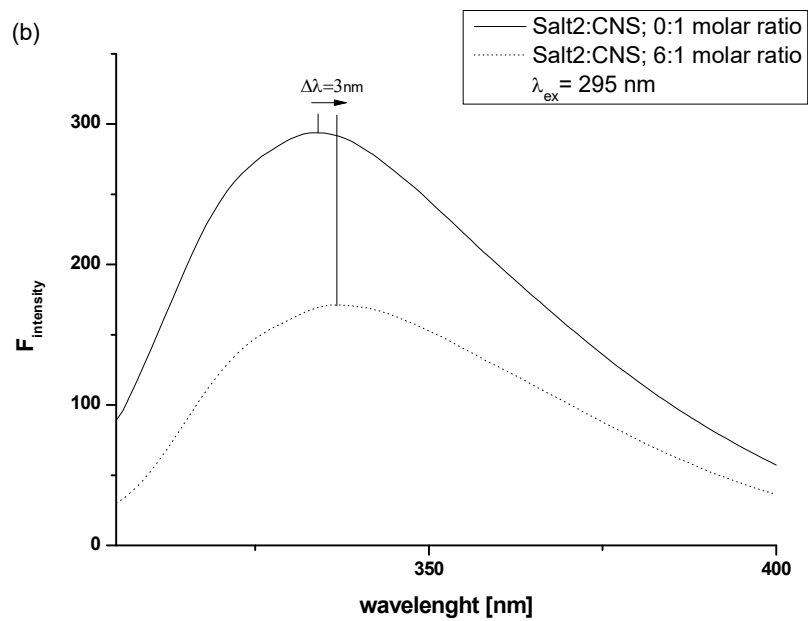

**Figure S4.** Emission fluorescence spectra of control normal serum (CNS) in the presence of Salt2 at Salt2:HSA 0:1 and 7:1 and Salt2:HSA 0:1 and 6:1 molar ratios at a)  $\lambda_{\text{ex}}$  275 nm and b)  $\lambda_{\text{ex}}$  295 nm, respectively.
